# Supplementary material
Source: PubMed Central journal article supplement (PMC2952231)
Supplement: supp_M110.114504_jbc.M110.114504-1.pdf [file supp_M110.114504_jbc.M110.114504-1.pdf]

## Supplemental

| <b>Table S1. Intrinsic Exchange Rates (1/s)</b> |            |                         |                         |
|-------------------------------------------------|------------|-------------------------|-------------------------|
| Residue                                         | DMSO pH* 5 | H <sub>2</sub> O pH 3.0 | H <sub>2</sub> O pH 7.5 |
| G89                                             |            |                         |                         |
| Q90                                             | 1.1E-03    | 4.9E-02                 | 3.1E+02                 |
| G91                                             | 8.0E-05    | 2.9E-03                 | 6.4E+01                 |
| G92*                                            | 2.4E-04    | 3.1E-03                 | 6.0E+01                 |
| G93*                                            | 2.4E-04    | 3.1E-03                 | 6.0E+01                 |
| T94                                             | 3.0E-05    | 1.7E-03                 | 2.7E+01                 |
| H95                                             | 7.0E-05    | 7.6E-03                 | 3.1E+01                 |
| N96                                             | 9.6E-05    | 1.5E-02                 | 1.0E+02                 |
| Q97                                             | 1.6E-04    | 2.5E-03                 | 5.2E+01                 |
| W98                                             | 6.0E-05    | 1.3E-03                 | 1.3E+01                 |
| N99                                             | 9.7E-05    | 2.5E-03                 | 5.2E+01                 |
| K100                                            | 2.2E-04    | 2.2E-03                 | 4.1E+01                 |
| L101                                            | 4.0E-05    | 1.1E-03                 | 7.5E+00                 |
| S102                                            | 2.9E-04    | 1.9E-03                 | 3.1E+01                 |
| K103                                            | 4.0E-05    | 2.1E-03                 | 3.9E+01                 |
| P104                                            |            |                         |                         |
| K105                                            | 4.2E-04    | 1.2E-03                 | 1.1E+01                 |
| T106                                            | 3.0E-05    | 1.6E-03                 | 2.4E+01                 |
| N107                                            | 9.0E-06    | 4.2E-03                 | 1.1E+02                 |
| L108                                            | 1.0E-03    | 1.2E-03                 | 1.2E+01                 |
| K109                                            | 8.0E-06    | 1.2E-03                 | 1.2E+01                 |
| H110                                            | 2.0E-05    | 6.5E-03                 | 2.6E+01                 |
| V111                                            | 7.6E-05    | 1.7E-03                 | 6.6E+00                 |
| A112                                            | 4.0E-05    | 1.5E-03                 | 1.6E+01                 |
| G113                                            | 3.0E-06    | 2.3E-03                 | 4.0E+01                 |
| A114                                            | 3.0E-05    | 2.5E-03                 | 3.2E+01                 |
| A115                                            | 1.6E-04    | 1.9E-03                 | 2.2E+01                 |
| A116                                            | 3.3E-04    | 1.9E-03                 | 2.2E+01                 |
| A117                                            | 3.0E-05    | 1.9E-03                 | 2.2E+01                 |
| G118                                            | 5.0E-05    | 2.3E-03                 | 4.0E+01                 |
| A119                                            | 6.0E-05    | 2.5E-03                 | 3.2E+01                 |
| V120                                            | 1.0E-05    | 9.8E-04                 | 4.3E+00                 |
| V121                                            | 4.0E-05    | 9.0E-04                 | 3.1E+00                 |
| G122                                            | 1.3E-04    | 1.8E-03                 | 2.9E+01                 |
| G123*                                           | 2.4E-04    | 3.1E-03                 | 6.0E+01                 |
| L124                                            | 1.2E-04    | 1.2E-03                 | 8.4E+00                 |
| G125                                            | 1.4E-04    | 1.7E-03                 | 2.5E+01                 |
| G126*                                           | 2.4E-04    | 3.1E-03                 | 6.0E+01                 |
| Y127                                            | 2.8E-04    | 1.6E-03                 | 1.7E+01                 |
| M128                                            | 1.5E-04    | 1.6E-03                 | 2.4E+01                 |
| L129                                            | 1.4E-04    | 1.1E-03                 | 7.3E+00                 |
| G130                                            | 9.0E-05    | 1.7E-03                 | 2.5E+01                 |
| S131                                            | 5.0E-05    | 3.4E-03                 | 7.5E+01                 |
| A132                                            | 9.7E-05    | 2.3E-03                 | 4.3E+01                 |
| M133                                            | 3.8E-04    | 1.5E-03                 | 2.1E+01                 |
| S134                                            | 3.0E-05    | 2.9E-03                 | 6.5E+01                 |
| R135                                            | 2.2E-04    | 2.5E-03                 | 5.2E+01                 |
| P136                                            |            |                         |                         |
| M137                                            | 2.0E-05    | 1.2E-03                 | 1.2E+01                 |
| L138                                            | 3.2E-05    | 9.6E-04                 | 5.2E+00                 |
| H139                                            | 3.0E-06    | 3.3E-03                 | 1.2E+01                 |
| F140                                            | 3.0E-06    | 3.5E-03                 | 1.9E+01                 |
| G141                                            | 5.0E-05    | 2.3E-03                 | 4.6E+01                 |
| S142                                            | 6.0E-05    | 3.4E-03                 | 7.5E+01                 |
| D143                                            | 1.0E-03    | 2.3E-03                 | 3.4E+01                 |

**Table S1**

Experimental amide exchange rates for all the residues of DMSO-denatured PrP(89-143, P101L) and, for comparison, the calculated exchange rates in water at pH 3.0 where exchange rate is at the minimum (1) and at pH 7.5. It is evident that the quenching in DMSO is much more efficient than in water.

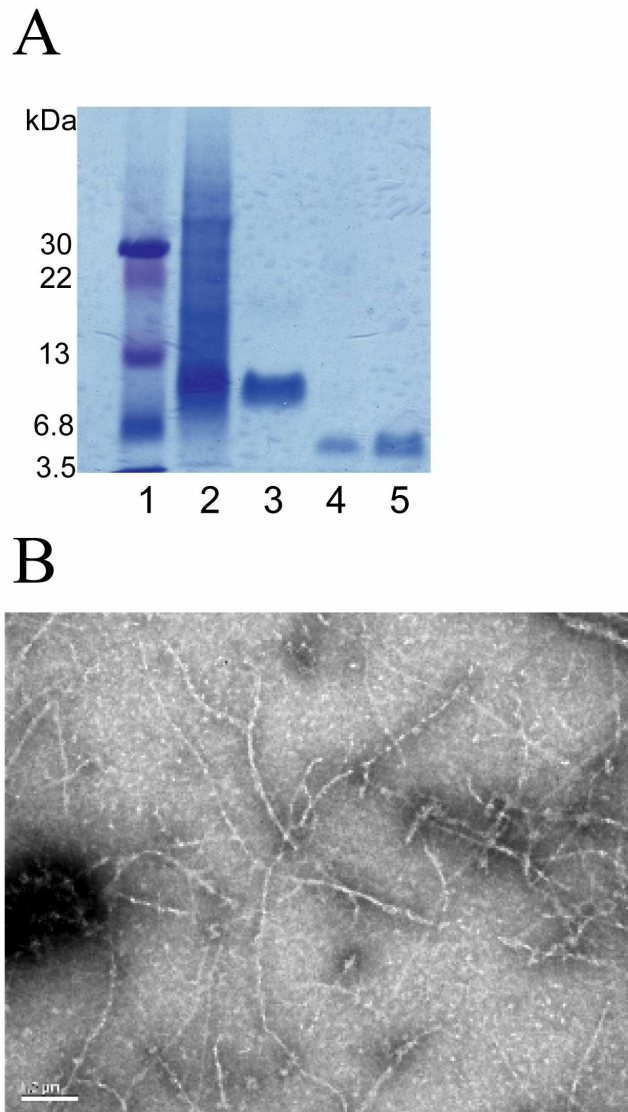**Figure S1**

**A)** SDS-PAGE of the PrP(89-143, P101L) purification process (**Lane 1**) Protein molecular weight standards, MW in KDa, given on the left side next to the corresponding band (**Lane 2**) Whole, lysed *E. coli* cells after induction. (**Lane 3**) PrP(89-143, P101L) eluted from the nickel column prior to TEV cleavage (**Lane 4**) PrP(89-143, P101L) after TEV proteolysis to remove the 6-His tag (**Lane 5**) PrP(89-143, P101L) after removal of TEV and the 6-His tag **B)** Electron micrograph of PrP(89-143, P101L) fibrils, the bar represents 1.2  $\mu\text{m}$

1. Bai, Y. W., Milne, J. S., Mayne, L., and Englander, S. W. (1993) *Proteins-Structure Function and Genetics* **17**, 75-86
